# Supplementary material for: Asian Dust and Pediatric Emergency Department Visits Due to Bronchial Asthma and Respiratory Diseases in Nagasaki, Japan
Source: PubMed Central journal article supplement (PMC5083323; doi:10.2188/jea.je20150309), 2016-11-05
Supplement: je-26-593-s001.pdf [file je-26-593-s001.pdf]

**e Table 1.** Association between Asian dust and emergency department visits due to bronchial asthma by categories of Asian dust extinction coefficient

| Category                                                                 | Lag   | All Children<br>(0-15 years old) | Preschool Children<br>(0-5 years old) | School Children<br>(6-15 years old) |
|--------------------------------------------------------------------------|-------|----------------------------------|---------------------------------------|-------------------------------------|
|                                                                          |       | OR <sup>a</sup> (95% CI)         | OR <sup>a</sup> (95% CI)              | OR <sup>a</sup> (95% CI)            |
| Non-Asian dust days<br>Moderate Asian dust days<br>Heavy Asian dust days | Lag 0 | 1.051 (0.930-1.187)              | 1.052 (0.911-1.215)                   | 1.033 (0.818-1.306)                 |
|                                                                          | Lag 1 | 1.043 (0.926-1.173)              | 1.051 (0.916-1.206)                   | 1.009 (0.800-1.272)                 |
|                                                                          | Lag 2 | 1.109 (0.989-1.243)              | 1.063 (0.928-1.217)                   | 1.224 (0.987-1.519)                 |
|                                                                          | Lag 3 | 1.120 (0.996-1.260)              | 1.059 (0.921-1.218)                   | 1.293 (1.038-1.611)                 |
|                                                                          | Lag 4 | 1.220 (1.084-1.373)              | 1.234 (1.073-1.420)                   | 1.175 (0.943-1.464)                 |
|                                                                          | Lag 5 | 0.909 (0.797-1.035)              | 0.856 (0.733-0.999)                   | 1.072 (0.838-1.373)                 |

Non-Asian dust days (Asian dust extinction coefficient <0.047/km), Moderate Asian dust days (0.047/km-0.065/km)  
Heavy Asian dust days ( $\geq$ 0.066/km)

<sup>a</sup> Odds ratios (ORs) and 95% confidence intervals (CIs) for one unit increase in categories were estimated in basic models (adjusted by temperature and humidity)
