# Supplementary material for: Asian Dust and Pediatric Emergency Department Visits Due to Bronchial Asthma and Respiratory Diseases in Nagasaki, Japan
Source: PubMed Central journal article supplement (PMC5083323; doi:10.2188/jea.je20150309), 2016-11-05
Supplement: je-26-593-s002.pdf [file je-26-593-s002.pdf]

**e Table 2.** Association between Asian dust and emergency department visits due to respiratory diseases by categories of Asian dust extinction coefficient

| Category                                                                 | Lag   | All Children<br>(0-15 years old) | Preschool Children<br>(0-5 years old) | School Children<br>(6-15 years old) |
|--------------------------------------------------------------------------|-------|----------------------------------|---------------------------------------|-------------------------------------|
|                                                                          |       | OR <sup>a</sup> (95% CI)         | OR <sup>a</sup> (95% CI)              | OR <sup>a</sup> (95% CI)            |
| Non-Asian dust days<br>Moderate Asian dust days<br>Heavy Asian dust days | Lag 0 | 1.119 (1.070-1.169)              | 1.123 (1.067-1.181)                   | 1.106 (1.011-1.209)                 |
|                                                                          | Lag 1 | 1.120 (1.073-1.169)              | 1.120 (1.065-1.176)                   | 1.120 (1.029-1.220)                 |
|                                                                          | Lag 2 | 1.064 (1.017-1.113)              | 1.064 (1.010-1.122)                   | 1.061 (0.969-1.161)                 |
|                                                                          | Lag 3 | 0.990 (0.945-1.038)              | 0.964 (0.913-1.018)                   | 1.070 (0.975-1.173)                 |
|                                                                          | Lag 4 | 0.970 (0.925-1.017)              | 0.946 (0.895-1.000)                   | 1.041 (0.950-1.141)                 |
|                                                                          | Lag 5 | 0.913 (0.870-0.959)              | 0.905 (0.855-0.957)                   | 0.939 (0.853-1.033)                 |

Non-Asian dust days (Asian dust extinction coefficient <0.047/km), Moderate Asian dust days (0.047/km-0.065/km)  
Heavy Asian dust days ( $\geq$ 0.066/km)

<sup>a</sup>Odds ratios (ORs) and 95% confidence intervals (CIs) for one unit increase in categories were estimated in basic models (adjusted by temperature and humidity)
