# Supplementary material for: Asian Dust and Pediatric Emergency Department Visits Due to Bronchial Asthma and Respiratory Diseases in Nagasaki, Japan
Source: PubMed Central journal article supplement (PMC5083323; doi:10.2188/jea.je20150309), 2016-11-05
Supplement: je-26-593-s003.pdf [file je-26-593-s003.pdf]

**e Table 3.** Association between Asian dust and emergency department visits for bronchial asthma among school children; all subjects vs. subjects excluding those revisiting within 4 weeks

| Exposure              | Lag    | All subjects        | Subjects except revisiting cases within 4 weeks |
|-----------------------|--------|---------------------|-------------------------------------------------|
|                       |        | OR (95% CI)         | OR (95% CI)                                     |
| Asian dust<br>(LIDAR) | Lag 0  | 1.291 (0.850-1.961) | 1.401 (0.918-2.138)                             |
|                       | Lag 1  | 1.599 (1.032-2.478) | 1.848 (1.176-2.904)                             |
|                       | Lag 2  | 1.394 (0.891-2.182) | 1.626 (1.025-2.577)                             |
|                       | Lag 3  | 1.787 (1.174-2.721) | 1.897 (1.234-2.916)                             |
|                       | Lag 4  | 1.807 (1.163-2.809) | 1.848 (1.166-2.930)                             |
|                       | Lag 5  | 0.894 (0.550-1.453) | 0.858 (0.512-1.438)                             |
|                       | Lag 01 | 1.329 (0.915-1.930) | 1.497 (1.022-2.194)                             |
|                       | Lag 02 | 1.136 (0.794-1.625) | 1.279 (0.886-1.845)                             |
|                       | Lag 03 | 1.173 (0.840-1.639) | 1.273 (0.903-1.793)                             |
|                       | Lag 04 | 1.131 (0.822-1.557) | 1.223 (0.882-1.696)                             |
|                       | Lag 05 | 1.020 (0.739-1.408) | 1.108 (0.795-1.154)                             |

CI, confidence interval; LIDAR, light detection and ranging; OR, odds ratio.
