# Supplementary material for: Asian Dust and Pediatric Emergency Department Visits Due to Bronchial Asthma and Respiratory Diseases in Nagasaki, Japan
Source: PubMed Central journal article supplement (PMC5083323; doi:10.2188/jea.je20150309), 2016-11-05
Supplement: je-26-593-s004.pdf [file je-26-593-s004.pdf]

**e Table 4.** Association between Asian dust and emergency department visits for bronchial asthma among school children; comparison March-May vs. whole year

| Exposure              | Lag    | March-May           | Whole-year          |
|-----------------------|--------|---------------------|---------------------|
|                       |        | OR (95% CI)         | OR (95% CI)         |
| Asian dust<br>(LIDAR) | Lag 0  | 1.291 (0.850-1.961) | 1.323 (0.914-1.914) |
|                       | Lag 1  | 1.599 (1.032-2.478) | 1.203 (0.825-1.753) |
|                       | Lag 2  | 1.394 (0.891-2.182) | 1.287 (0.903-1.834) |
|                       | Lag 3  | 1.787 (1.174-2.721) | 1.463 (1.035-2.070) |
|                       | Lag 4  | 1.807 (1.163-2.809) | 1.218 (0.837-1.774) |
|                       | Lag 5  | 0.894 (0.550-1.453) | 0.898 (0.594-1.356) |
|                       | Lag 01 | 1.329 (0.915-1.930) | 1.188 (0.864-1.633) |
|                       | Lag 02 | 1.136 (0.794-1.625) | 1.070 (0.804-1.424) |
|                       | Lag 03 | 1.173 (0.840-1.639) | 1.026 (0.791-1.329) |
|                       | Lag 04 | 1.131 (0.822-1.557) | 0.941 (0.737-1.203) |
|                       | Lag 05 | 1.020 (0.739-1.408) | 0.898 (0.706-1.143) |

CI, confidence interval; LIDAR, light detection and ranging; OR, odds ratio.
